# Supplementary material for: Anodic electrochemistry of Mn and Re tricarbonyl complexes of tris(oxazolinyl)phenyl borate ligands: comparison to tris(pyrazolyl) borate complexes
Source: Royal Society of Chemistry journal article supplement (doi:10.1039/c1nj20222g), 2011-01-01
Supplement: c1nj20222g.pdf [file c1nj20222g.pdf]

## Supplementary Material

### Anodic Electrochemical Behavior of New Mn and Re Tricarbonyl Complexes of Tris(oxazoliny)phenyl borate Ligands: Comparison to Analogous Tris(pyrazoly) borate Complexes

Kan Wu, Debabrata Mukherjee, Aaron D. Sadow, William E. Geiger

Two pages of cyclic voltammograms

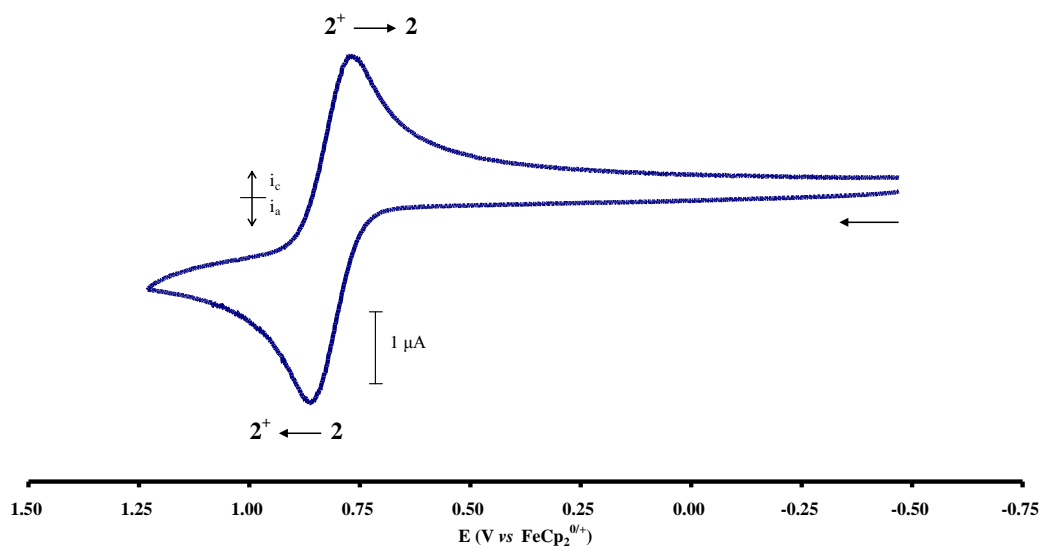

**S1.** Representative CV of 0.95 mM **2** in  $\text{CH}_2\text{Cl}_2/0.05 \text{ M } [\text{NBu}_4][\text{TFAB}]$  at 298 K, 200 mV/s, 1 mm GCE

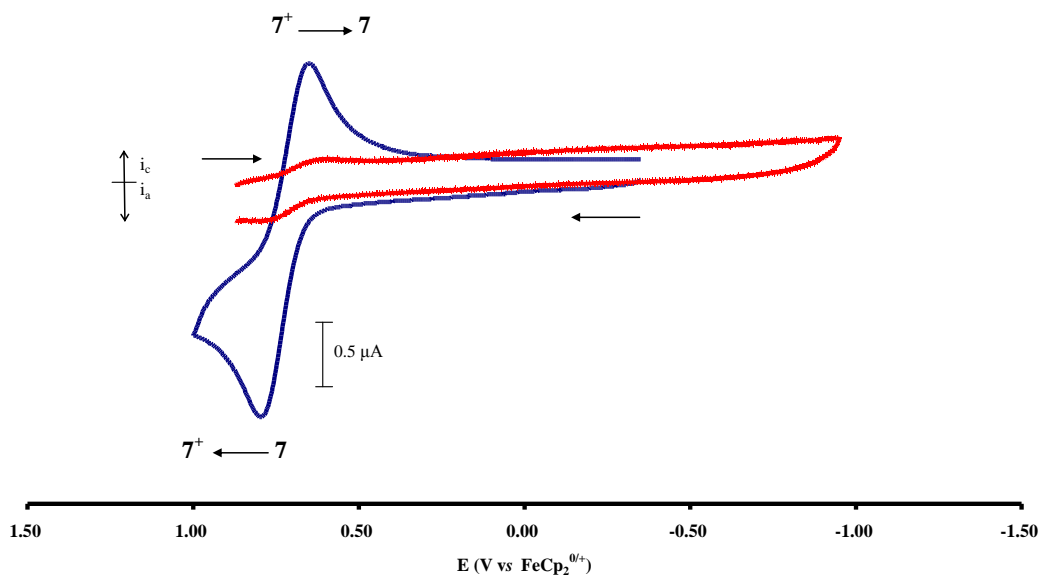

**S2.** Representative CVs of 1.0 mM **7** in  $\text{CH}_2\text{Cl}_2/0.05 \text{ M } [\text{NBu}_4][\text{TFAB}]$  before (solid blue) and after (dashed red) bulk oxidation at 253 K, 200 mV/s, 1 mm GCE
